# Supplementary material for: Comparative Transcriptomes of the Body Wall of Wild and Farmed Sea Cucumber Isostichopus badionotus
Source: MDPI journal article supplement (doi:10.3390/ijms22083882), 2021-04-09
Supplement: s1 [file s1]

## Supplementary Material

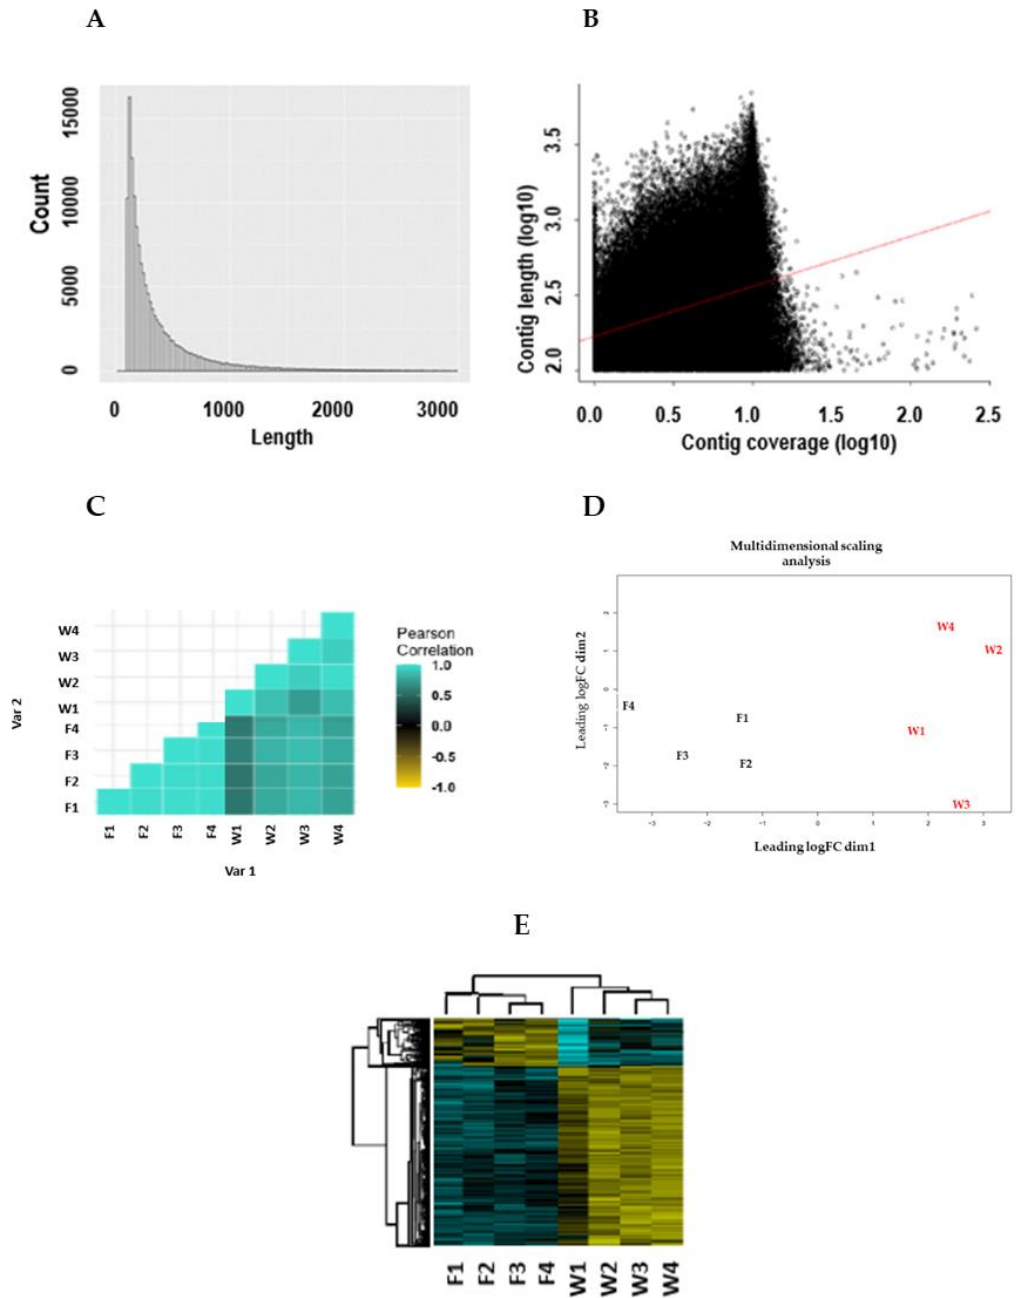

**Supplementary Figure S1.** Contig and PCA analysis of differentially expressed genes between wild and farmed sea cucumber *Isostichopus badionotus*.

A) Contig size distribution generated by Velvet. B) Log-log plots showing the relation of contig lengths to the number of reads assembled into each. C) Correlation among samples. D) Multidimensional scaling plot of the analyzed RNA-Seq samples. E) Hierarchical cluster analysis of differentially expressed genes.

**Supplementary Table S1.** Summary of weight, length, age and life status of each *Isostichopus badionotus* collected for RNAseq analysis.

| Descriptor | Code | Weight (g) | Length (cm) | Status | Age     |
|------------|------|------------|-------------|--------|---------|
| F1         | P1-N | 43.3       | 7           | Farmed | 2 years |
| F2         | P4-N | 24.4       | 7           | Farmed | 2 years |
| F3         | P5-N | 17.6       | 5           | Farmed | 2 years |
| F4         | P6-N | 24.6       | 7           | Farmed | 2 years |
| W1         | P1-W | 160.9      | 14          | Wild   | Adult*  |
| W2         | P8-W | 420.3      | 25          | Wild   | Adult*  |
| W3         | P7-W | 331.5      | 23.5        | Wild   | Adult*  |
| W4         | P2-W | 164.3      | 14.5        | Wild   | Adult*  |

\*Age assessed as approximately two year by method of Poot-Salazar et al, 2014 [20]

**Supplementary Table S2.** Summary of data quality of sequencing data used for *de-novo* assembly before and after pre-processing.

| Sample name                 | Read mates      | Raw reads   | % Duplicated | Unique reads | % Reads with adapter | % Reads passing quality filter | Nucleotides after trimming (bp) |
|-----------------------------|-----------------|-------------|--------------|--------------|----------------------|--------------------------------|---------------------------------|
| P1A1<br>(Wild1)             | R1<br>(forward) | 37,099,576  | 68,42        | 11,714,658   | 18,5                 | 100                            | 866,518,192<br>(98.3%)          |
|                             | R2<br>(reverse) | 237,099,576 | 64,25        | 13,261,924   | 19,1                 | 100                            | 947,949,670<br>(95.0%)          |
| P2A1<br>(Wild4)             | R1<br>(forward) | 43,091,441  | 60,97        | 16,819,783   | 18,5                 | 100                            | 1,245,173,664<br>(98.5%)        |
|                             | R2<br>(reverse) | 43,091,441  | 57,74        | 18,209,179   | 19,5                 | 100                            | 1,312,172,607<br>(95.8%)        |
| P7S1<br>(WILD3)<br>(Wild2)  | R1<br>(forward) | 38,520,780  | 59,69        | 15,527,746   | 22,3                 | 100                            | 1,083,996,267<br>(93.3%)        |
|                             | R2<br>(reverse) | 38,520,780  | 52,05        | 18,470,264   | 17,3                 | 100                            | 1,202,471,304<br>(86.9%)        |
| P8S16<br>(WILD2)<br>(Wild3) | R1<br>(forward) | 41,558,460  | 61,06        | 16,184,606   | 19,6                 | 100                            | 1,181,327,694<br>(97.5%)        |
|                             | R2<br>(reverse) | 41,558,460  | 52,99        | 19,534,631   | 18,1                 | 100                            | 1,306,416,567<br>(89.1%)        |
| <b>Totals</b>               |                 | 320,540,514 |              | 129,722,791  |                      |                                | 9,146,025,965                   |

**Supplementary Table S3.** Summary of obtained assemblies using different k-mer length. Based on the best N50 values, selected assemblies for merging are highlighted.

| Sample name   | k-mer length | N50 Value |
|---------------|--------------|-----------|
| P2A1 (Wild4)  | 51           | 634       |
| P8S16 (Wild2) | 51           | 457       |
| P1A1 (Wild1)  | 51           | 443       |
| P7S1 (Wild3)  | 51           | 428       |
| P2A1 (Wild4)  | 49           | 652       |
| P8S16 (Wild2) | 49           | 473       |
| P1A1 (Wild1)  | 49           | 462       |
| P7S1 (Wild3)  | 49           | 441       |
| P2A1 (Wild4)  | 43           | 536       |
| P8S16 (Wild2) | 43           | 508       |
| P1A1 (Wild1)  | 43           | 498       |
| P7S1 (Wild3)  | 43           | 478       |
| P2A1 (Wild4)  | 41           | 541       |
| P8S16 (Wild2) | 41           | 520       |
| P1A1 (Wild1)  | 41           | 510       |
| P7S1 (Wild3)  | 41           | 486       |
| P2A1 (Wild4)  | 37           | 558       |
| P8S16 (Wild2) | 37           | 536       |
| P1A1 (Wild1)  | 37           | 531       |
| P7S1 (Wild3)  | 37           | 505       |
| P2A1 (Wild4)  | 35           | 566       |
| P1A1 (Wild1)  | 35           | 543       |
| P8S16 (Wild2) | 35           | 541       |
| P7S1 (Wild3)  | 35           | 513       |
| P2A1 (Wild4)  | 31           | 367       |
| P1A1 (Wild1)  | 31           | 358       |
| P8S16 (Wild2) | 31           | 345       |
| P7S1 (Wild3)  | 31           | 337       |
| P2A1 (Wild4)  | 29           | 361       |
| P1A1 (Wild1)  | 29           | 356       |
| P8S16 (Wild2) | 29           | 337       |
| P7S1 (Wild3)  | 29           | 332       |
| P1A1 (Wild1)  | 25           | 343       |
| P2A1 (Wild4)  | 25           | 340       |
| P7S1 (Wild3)  | 25           | 317       |
| P8S16 (Wild2) | 25           | 313       |
| P1A1 (Wild1)  | 23           | 331       |
| P2A1 (Wild4)  | 23           | 321       |
| P7S1 (Wild3)  | 23           | 303       |
| P8S16 (Wild2) | 23           | 295       |

**Supplementary Table S4.** Summary statistics of *de novo assembly* for *Isostichopus badionotus* transcriptome and its functional annotation.

|                        |                                     |          |
|------------------------|-------------------------------------|----------|
| <b>Merged assembly</b> | Number of contigs                   | 148,431  |
|                        | Maximum contig length               | 6,957bp  |
|                        | Minimum contig length               | 101bp    |
|                        | Average contig length               | 384,9bp  |
| <b>Final Assembly</b>  | Number of transcripts               | 132,257  |
|                        | Maximum transcript length           | 10,560bp |
|                        | Minimum transcript length           | 101bp    |
|                        | Average transcript length           | 679bp    |
|                        | N50 value                           | 1,219bp  |
| <b>Annotation</b>      | Unigenes with blast hits to NT      | 5,275    |
|                        | Unigenes with blast hits to Uniprot | 21,783   |
|                        | Unigenes with GO Terms              | 11,425   |

**Supplementary Table S5.** Gene Ontology (GO) specific term frequency. (see Excel file attached).

**Supplementary Table S6.** Overall alignment rates obtained after mapping wild I. badionotus samples against 3 different genomic references.

| <b>Sample</b> | <b>GFKU00000000.1</b> | <b>GHCH00000000.1</b> | <b>ASM275485v1</b> |
|---------------|-----------------------|-----------------------|--------------------|
| W1            | 0.31%                 | 0.31%                 | 0.29%              |
| W2            | 0.98%                 | 1.03%                 | 0.75%              |
| W3            | 0.93%                 | 0.96%                 | 0.56%              |
| W4            | 0.53%                 | 0.54%                 | 0.45%              |

**Supplementary Table S7:** Top 10 Genes detected after mapping Wild2 sample (W2) reads against *Apostichopus japonicus* genome assembly ASM275485v1

| <b>Gene Symbol</b> | <b>Hits</b> | <b>Annotation</b>                                             |
|--------------------|-------------|---------------------------------------------------------------|
| <hr/>              |             |                                                               |
| BSL78_17570        | 98          | hypothetical protein BSL78_17570                              |
| BSL78_14729        | 79          | hypothetical protein BSL78_14729                              |
| BSL78_28138        | 78          | putative dynein heavy chain 3, axonemal-like, partial         |
| BSL78_08597        | 77          | hypothetical protein BSL78_08597                              |
| BSL78_21986        | 77          | hypothetical protein BSL78_21986                              |
| BSL78_18981        | 76          | hypothetical protein BSL78_18981                              |
| BSL78_12831        | 75          | putative neurogenic locus Notch protein, partial              |
| BSL78_12882        | 72          | putative vacuolar protein sorting-associated protein 13A-like |
| BSL78_25012        | 67          | putative dynein heavy chain 3, axonemal                       |
| BSL78_12572        | 63          | putative IgGFc-binding protein                                |
| <hr/>              |             |                                                               |



**Supplementary Table S8.** Differentially expressed transcripts showing a hit with NT database. (see Excel file attached)

Data includes gene symbols without determined orthologs (LOC) and locus tags obtained from sequencing projects.

**Supplementary Table S9.** KEGG\_ko mapping. (see Excel file attached)

**Supplementary Table S10.** Primers used in the expression analysis by RT-qPCR.

| Transcript    | Sequence 5-3'          | Amplicon length |
|---------------|------------------------|-----------------|
| COX1_PATPE-F  | GCGTGGGCTGTTACAACACTAC | 133             |
| COX1_PATPE-R  | GCAGGAATGGTTTTGGAGCAT  |                 |
| RL18A_DANRE-F | CAAACCCCTGTCACCAGGGAA  | 134             |
| RL18A_DANRE-R | ACGTTTGAAAATCCCCGAGC   |                 |
| RL39_DEBHA-F  | GGATTGGCCGATTCTGCTTC   | 163             |
| RL39_DEBHA-R  | CCAACACTGCCAGTAATTCCCA |                 |
| DMBT1-MOUSE-F | ACGACAGCCCTAAAACCCTG   | 153             |
| DMBT1-MOUSE-R | TGTTGGAAGTGGAGTGGAGC   |                 |
| TBA_NOTVI-F   | CTTGCCAGCTCCAGTCTCAC   | 109             |
| TBA_NOTVI-R   | CTGTCTGGAGCACGGTATCC   |                 |
| OST48_XENTR-F | CGATGTGTCAGACAAGCTGC   | 154             |
| OST48_XENTR-R | CACACCTTAGTCGTCGCTGA   |                 |
| TBA2_PATVU-F  | AGCGGTGGATACTTGTGGTG   | 106             |
| TBA2_PATVU-R  | CGGGTCTGGTTTCTCTTCCC   |                 |
| OST48_DANRE-F | TTACCCACAGCGAGGGGATA   | 123             |
| OST48_DANRE-R | AGGTGTTGGTATGACGGCTG   |                 |
| TBB_STRPU-F   | GAAGATAGCGGCGACTGTCA   | 121             |
| TBB_STRPU-R   | AAGTCAGCAGTACCGTGCTC   |                 |
| ATPA_PONAB-F  | TCCAAGAGCATCAACGACCC   | 150             |
| ATPA_PONAB-R  | GCTCTGAACTTGGAAGCCGA   |                 |
| ZN709_HUMAN-F | CTTCGTGCTGTAGGAGGGTC   | 134             |
| ZN709_HUMAN-R | CAAGGTCTGCGGAAAGGGAT   |                 |
| TBA_LEPDS-F   | ACCTGTGATCAGTTGCTCGG   | 173             |
| TBA_LEPDS-R   | CCGAGAAAGCGGTTGGATCT   |                 |
| RS5_HUMAN-F   | CCACGGCTGGTGGTAAGAAA   | 182             |
| RS5_HUMAN-R   | CAATCCGACAGATGGCGACT   |                 |
| Housekeeping  |                        |                 |
| MTB2-F        | GTGAATCCTGTACTGGCCTA   | 120             |
| MTB2-R        | TGGTGAGAGGATACAGGAAA   |                 |
